# Supplementary material
Source: PubMed Central journal article supplement (PMC170925)

**A**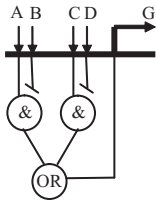**B**

| inputs     | A=0<br>B=0 | A=0<br>B=1 | A=1<br>B=1 | A=1<br>B=0 |
|------------|------------|------------|------------|------------|
| C=0<br>D=0 | 0          | 0          | 0          | 1          |
| C=0<br>D=1 | 0          | 0          | 0          | 1          |
| C=1<br>D=1 | 0          | 0          | 0          | 1          |
| C=1<br>D=0 | 1          | 1          | 1          | 1          |

**C**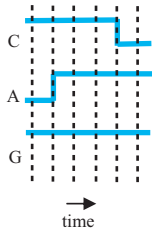**D**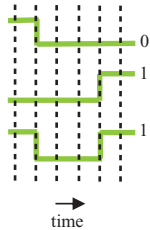**E**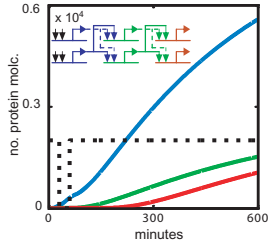**F**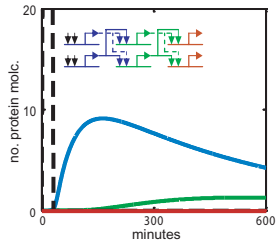

Supplement: pnas_1533293100_4.pdf [file pnas_1533293100_4.pdf]
